# Supplementary material for: Synthesis and photocatalytic activity of cation-doped titanium oxynitrides (Ti2.85−xMxO4N, M = Zn, Co, Cu)
Source: Royal Society of Chemistry journal article supplement (doi:10.1039/d4dt02378a), 2024-01-01
Supplement: d4dt02378a1.pdf [file d4dt02378a1.pdf]

## Supporting information

### Synthesis and Photocatalytic Activity of Cation-Doped Titanium Oxynitrides ( $\text{Ti}_{2.85-x}\text{M}_x\text{O}_4\text{N}$ , $M = \text{Zn, Co, Cu}$ )

Qijing Gao <sup>a</sup>, Wenyan Shi <sup>a, \*</sup>, Wenqian Chen <sup>a, \*</sup>

<sup>a</sup> Key Laboratory of Organic Compound Pollution Control Engineering (MOF), School of Environmental and Chemical Engineering, Shanghai University, No. 99, Shangda Road, Shanghai 200444, China.

*\*Corresponding author. E-mail addresses: [wys1981@shu.edu.cn](mailto:wys1981@shu.edu.cn) (W.Y. Shi), [wenqianchen@shu.edu.cn](mailto:wenqianchen@shu.edu.cn) (W. Q. Chen)*

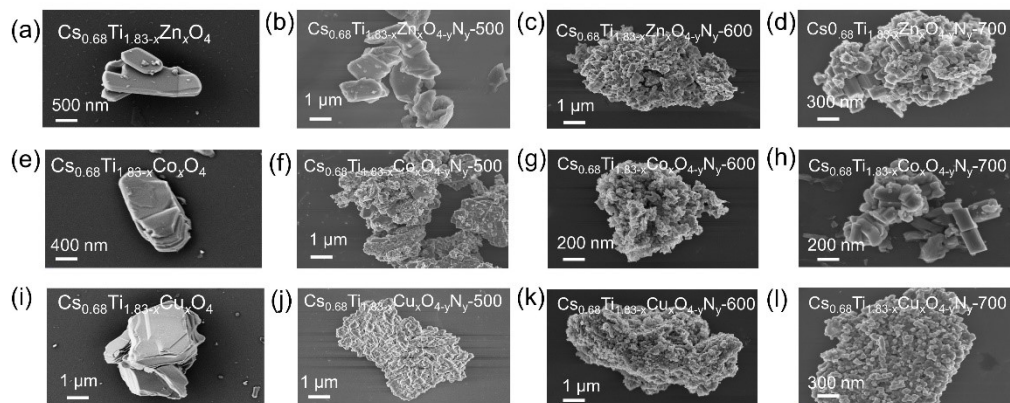

**Figure S1.** SEM images of oxides and oxynitrides doped with different cations: (a-d) Zn; (e-h) Co; (i-l) Cu.

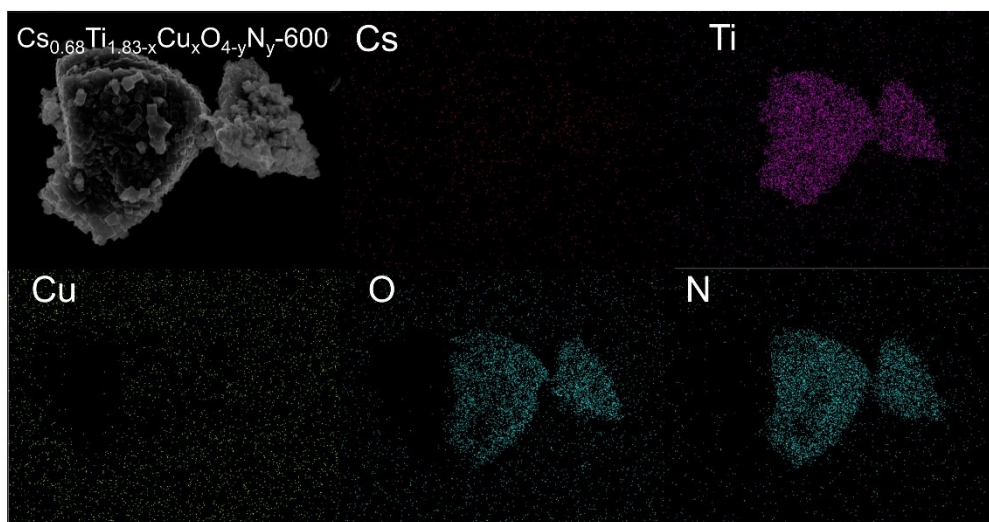

**Figure S2.** EDS mapping spectrum of  $\text{Cs}_{0.68}\text{Ti}_{1.83-x}\text{Cu}_x\text{O}_{4-y}\text{N}_y-600$ .

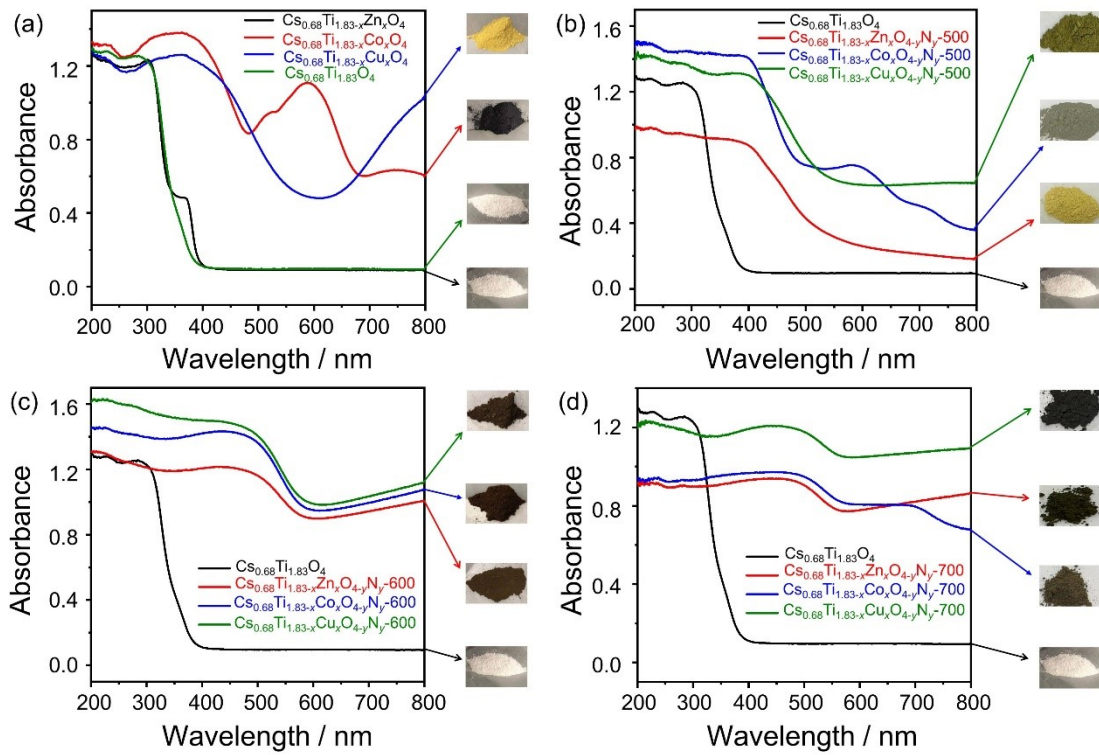

**Figure S3.** UV-visible diffuse reflection spectroscopy of (a) the oxides doped with different cations and synthesized oxynitrides at different temperatures (b) 500 °C; (c) 600 °C; (d) 700 °C.

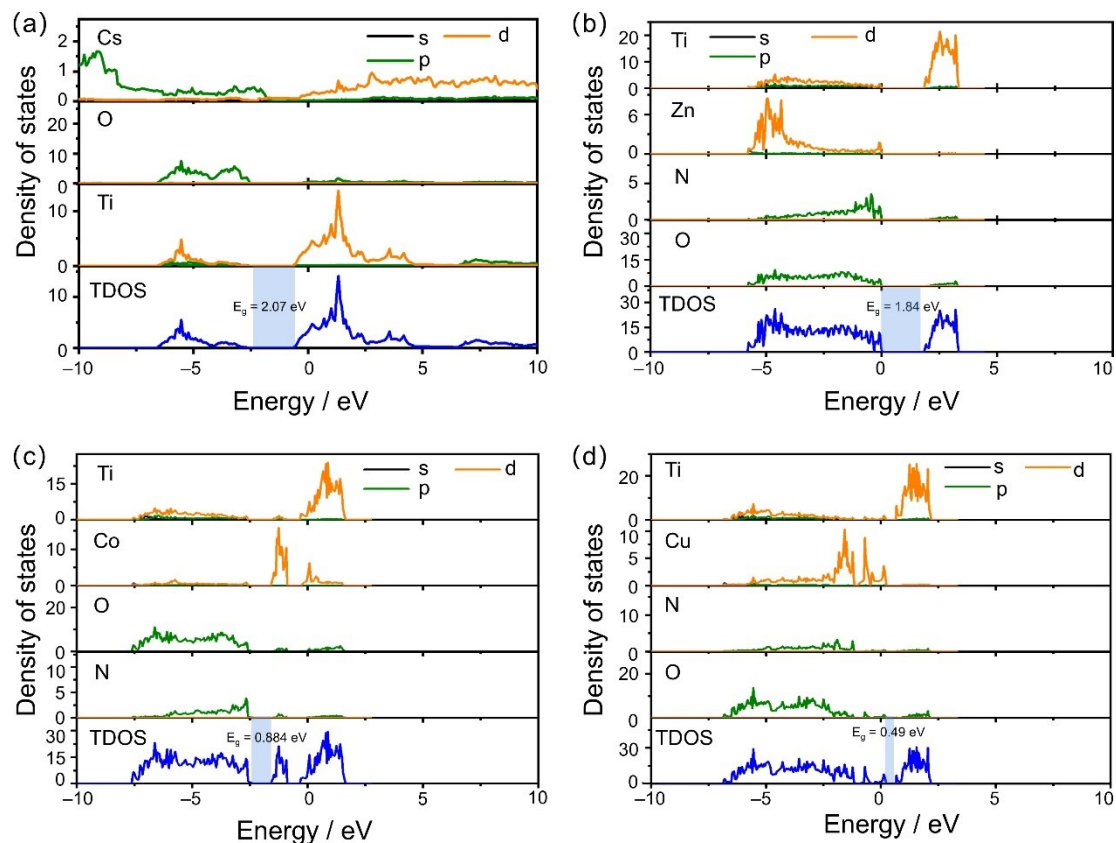

**Figure S4.** Total density states (TDOS) and partial density states (PDOS) of (a)  $\text{Cs}_{0.68}\text{Ti}_{1.83}\text{O}_4$  and (b)  $\text{Cs}_{0.68}\text{Ti}_{1.83-x}\text{Zn}_x\text{O}_{4-y}\text{N}_y$ -600, (c)  $\text{Cs}_{0.68}\text{Ti}_{1.83-x}\text{Co}_x\text{O}_{4-y}\text{N}_y$ -600, and (d)  $\text{Cs}_{0.68}\text{Ti}_{1.83-x}\text{Cu}_x\text{O}_{4-y}\text{N}_y$ -600.

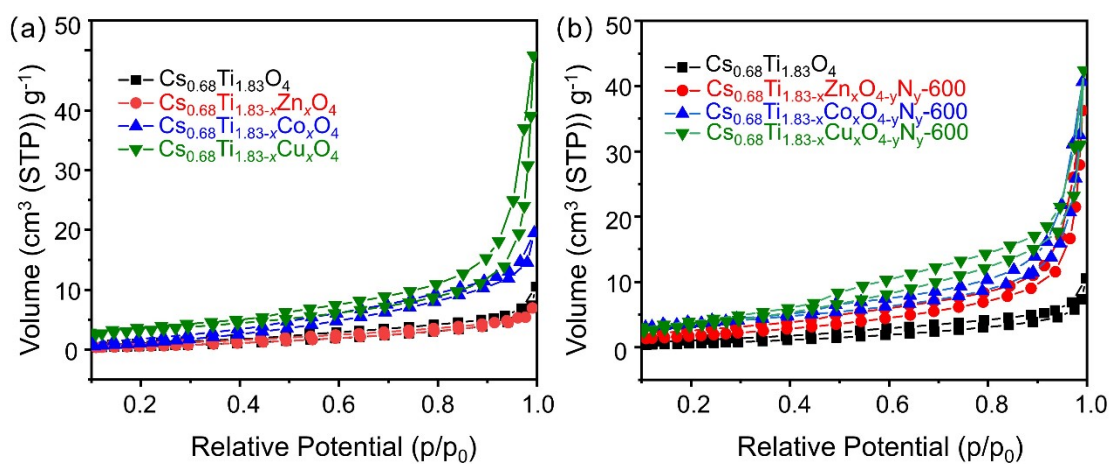

**Figure S5.** Nitrogen adsorption-desorption curves of (a) the oxides doped with different cations and (b) synthesized oxynitrides at 600 °C.

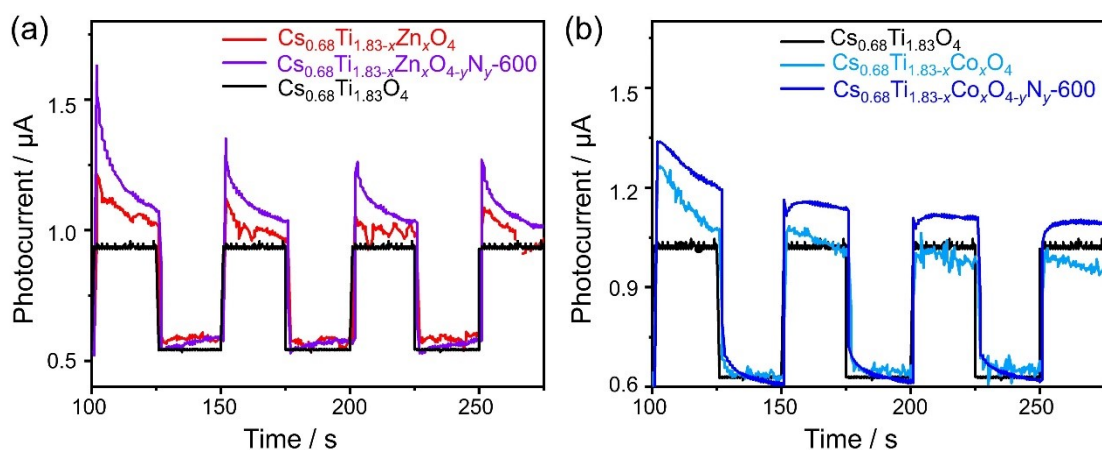

**Figure S6.** Transient photocurrent spectra of (a)  $\text{Cs}_{0.68}\text{Ti}_{1.83-x}\text{Zn}_x\text{O}_{4-y}\text{N}_y-600$  and (b)  $\text{Cs}_{0.68}\text{Ti}_{1.83-x}\text{Co}_x\text{O}_{4-y}\text{N}_y-600$

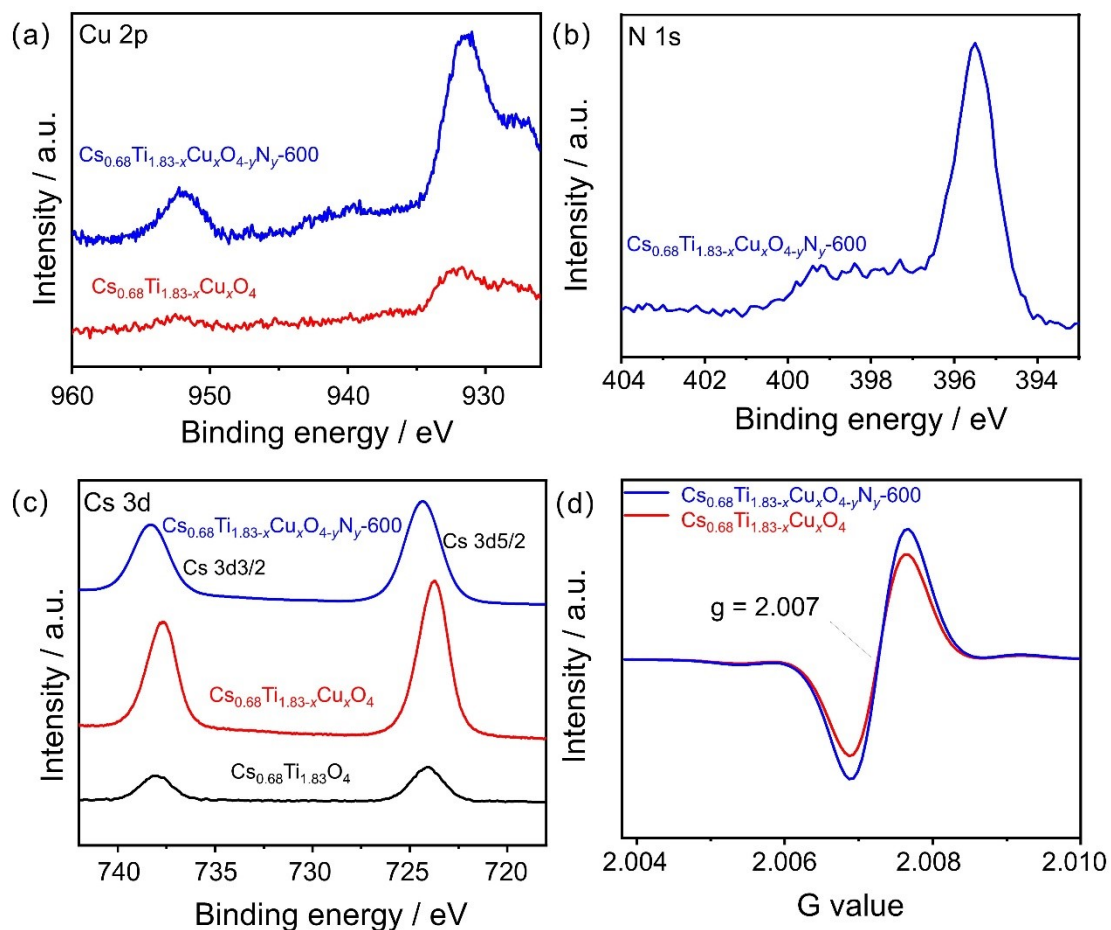

**Figure S7.** XPS spectrum of (a) Cu 2p (b) N 1s and (c) Cs 3d for  $\text{Cs}_{0.68}\text{Ti}_{1.83}\text{O}_4$ ,  $\text{Cs}_{0.68}\text{Ti}_{1.83-x}\text{Cu}_x\text{O}_4$ , and  $\text{Cs}_{0.68}\text{Ti}_{1.83-x}\text{Cu}_x\text{O}_{4-y}\text{N}_y-600$  were etched with Ar ion clusters at 30 nm, and (d) ESR spectra for  $\text{Cs}_{0.68}\text{Ti}_{1.83-x}\text{Cu}_x\text{O}_4$  and  $\text{Cs}_{0.68}\text{Ti}_{1.83-x}\text{Cu}_x\text{O}_{4-y}\text{N}_y-600$



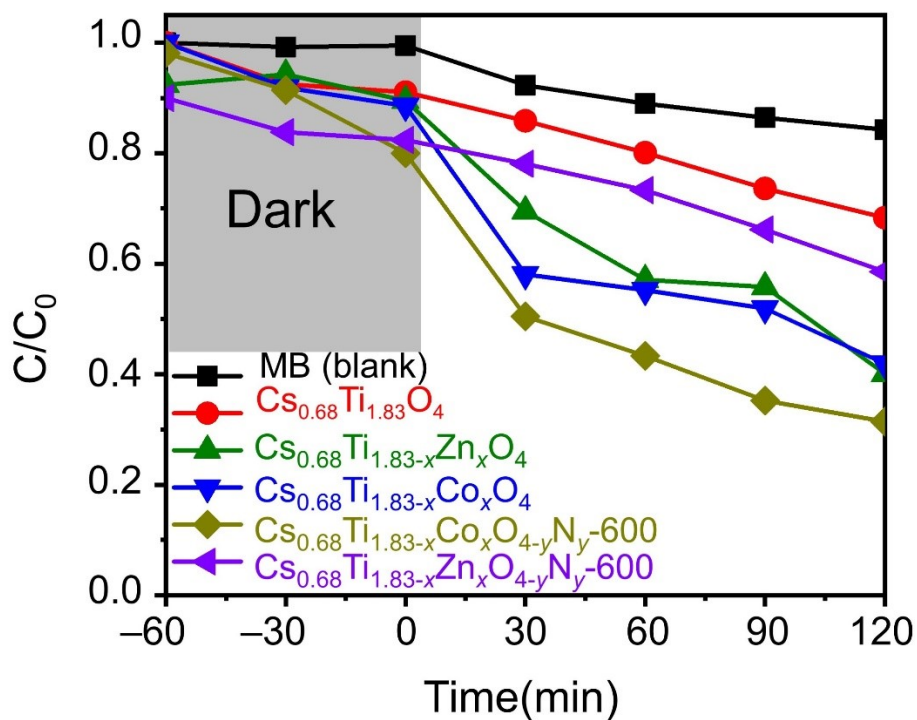

**Figure S8.** Photocatalytic degradation efficiency plots of Zn- and Co-doped titanium oxides and titanium nitrogen oxides for the photocatalytic degradation of methylene blue.

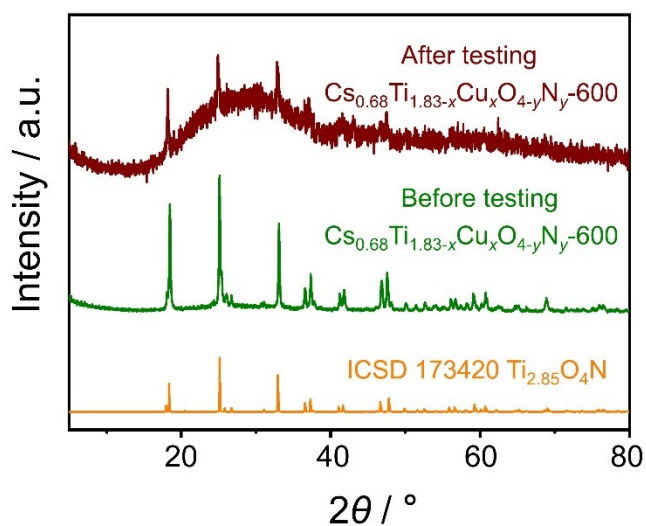

**Figure S9.** XRD patterns of  $Cs_{0.68}Ti_{1.83-x}Cu_xO_{4-y}N_y-600$  before and after photocatalytic reaction.

**Table S1.** The specific surface area and pore size of the oxides doped with different cations and synthesized oxynitrides at 600 °C.

|                                                                                              | Surface area (m <sup>2</sup> g <sup>-1</sup> ) | Pore volume (cm <sup>-3</sup> g <sup>-1</sup> ) | Pore size (nm) |
|----------------------------------------------------------------------------------------------|------------------------------------------------|-------------------------------------------------|----------------|
| Cs <sub>0.68</sub> Ti <sub>1.83</sub> O <sub>4</sub>                                         | 2.9837                                         | 0.0119                                          | 15.9533        |
| Cs <sub>0.68</sub> Ti <sub>1.83-x</sub> Zn <sub>x</sub> O <sub>4</sub>                       | 2.9236                                         | 0.0106                                          | 14.5027        |
| Cs <sub>0.68</sub> Ti <sub>1.83-x</sub> Co <sub>x</sub> O <sub>4</sub>                       | 11.2711                                        | 0.0277                                          | 9.8305         |
| Cs <sub>0.68</sub> Ti <sub>1.83-x</sub> Cu <sub>x</sub> O <sub>4</sub>                       | 12.1303                                        | 0.0671                                          | 22.1264        |
| Cs <sub>0.68</sub> Ti <sub>1.83-x</sub> Zn <sub>x</sub> O <sub>4-y</sub> N <sub>y</sub> -600 | 7.2967                                         | 0.0544                                          | 29.8217        |
| Cs <sub>0.68</sub> Ti <sub>1.83-x</sub> Co <sub>x</sub> O <sub>4-y</sub> N <sub>y</sub> -600 | 12.9577                                        | 0.0614                                          | 18.9540        |
| Cs <sub>0.68</sub> Ti <sub>1.83-x</sub> Cu <sub>x</sub> O <sub>4-y</sub> N <sub>y</sub> -600 | 14.3266                                        | 0.0572                                          | 15.9703        |
